# Supplementary material for: Retracing Micro-Epidemics of Chagas Disease Using Epicenter Regression
Source: PubMed Central journal article supplement (PMC3174153; doi:10.1371/journal.pcbi.1002146), 2011-09-15

# Movie of fitting Guadalupe data with 3 epicenters

Chain 20050

Likelihood =  $9.78e-71$

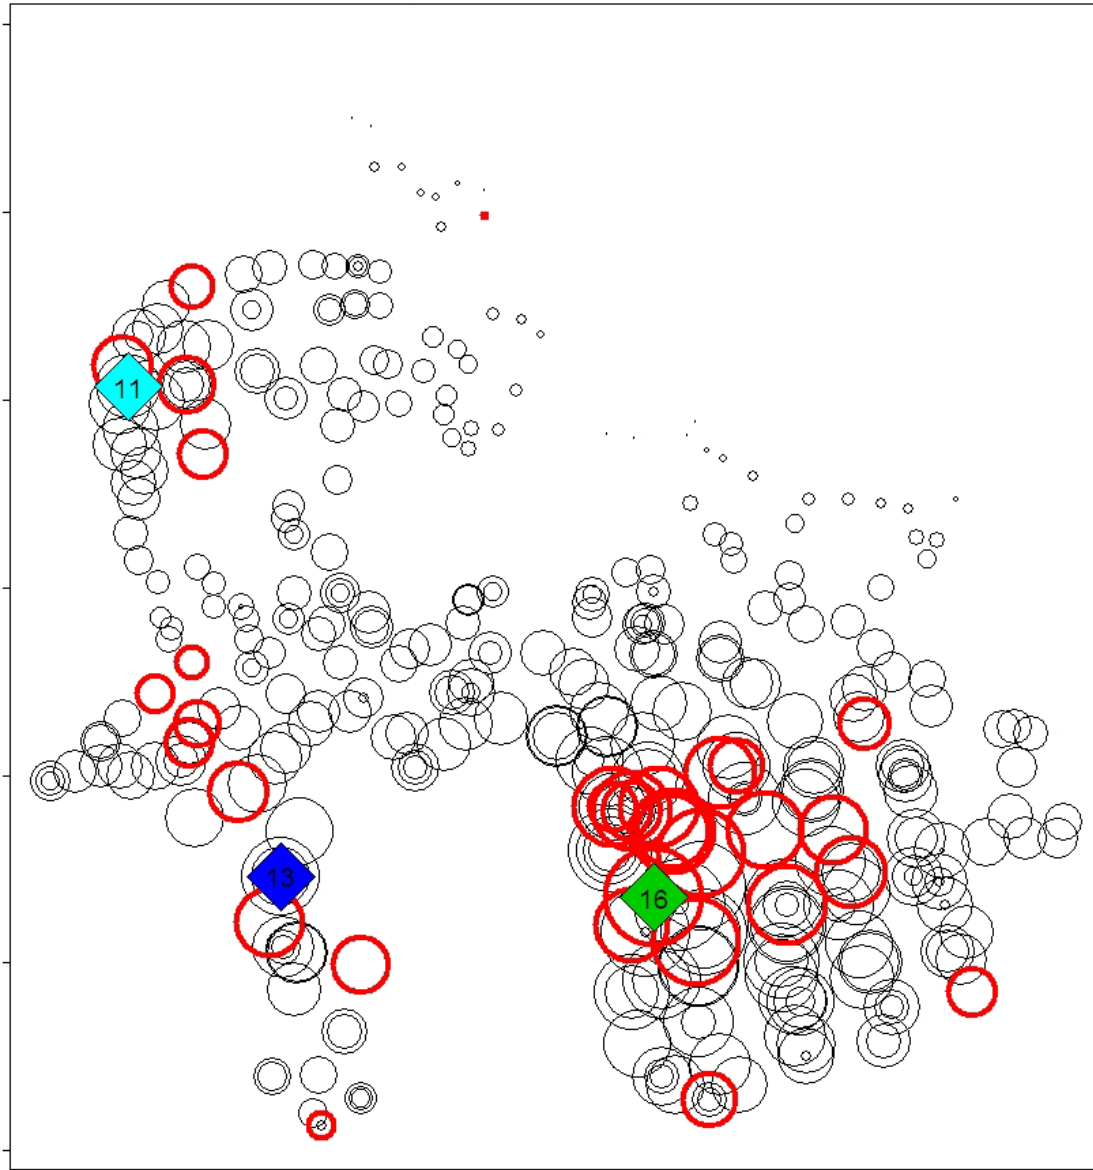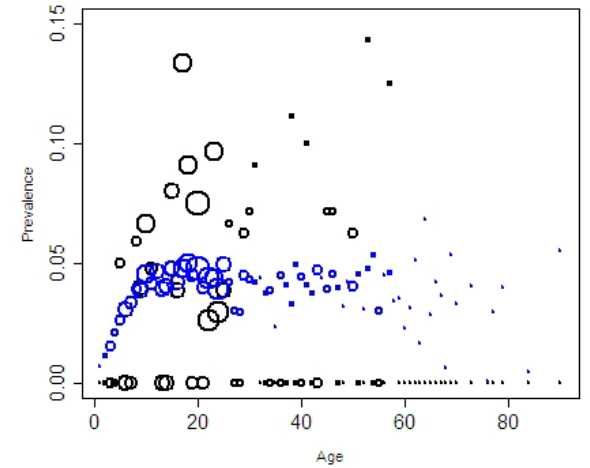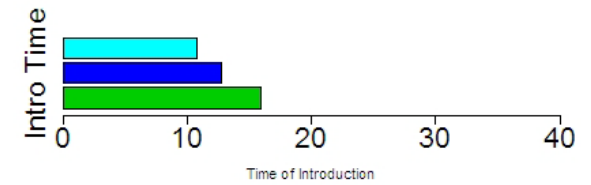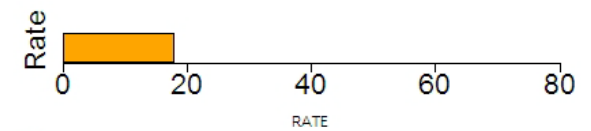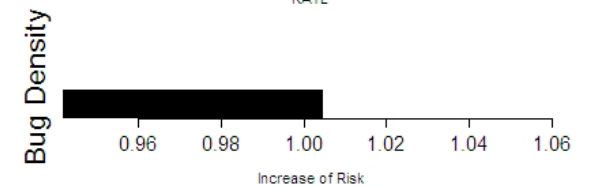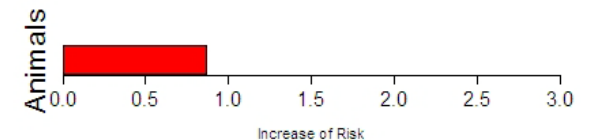

# Movie of fitting Guadalupe data with 3 epicenters

Chain 20050

Likelihood =  $9.78e-71$

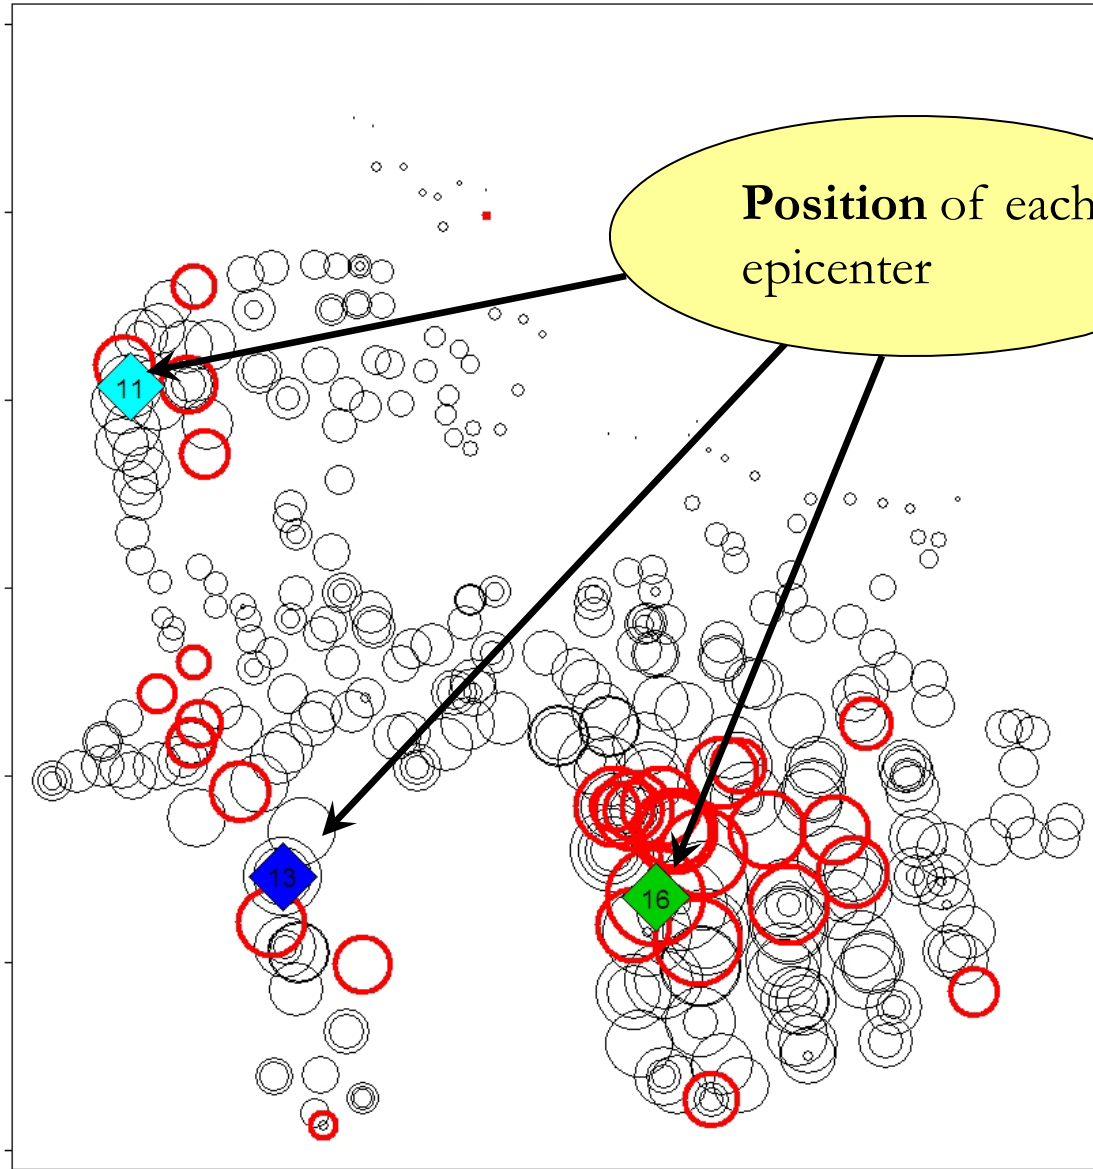

Position of each epicenter

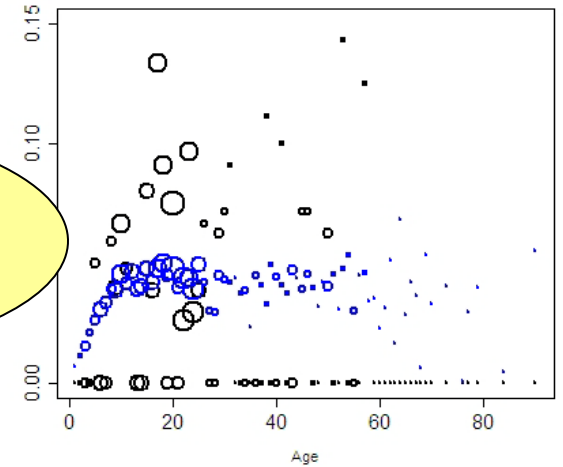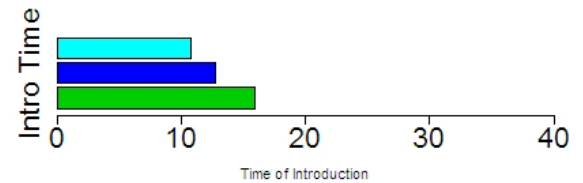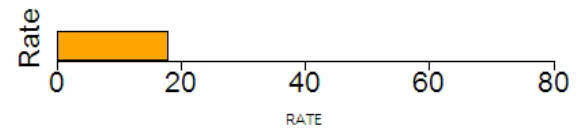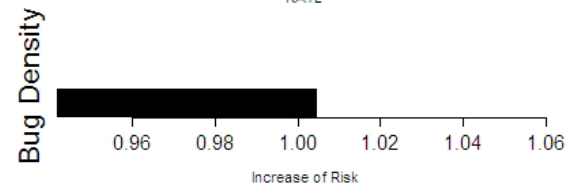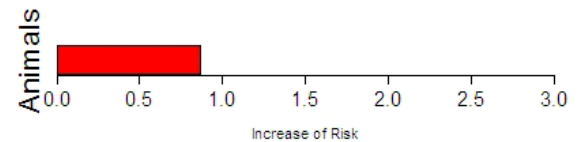

# Movie of fitting Guadalupe data with 3 epicenters

Chain 20050

Likelihood =  $9.78e-71$

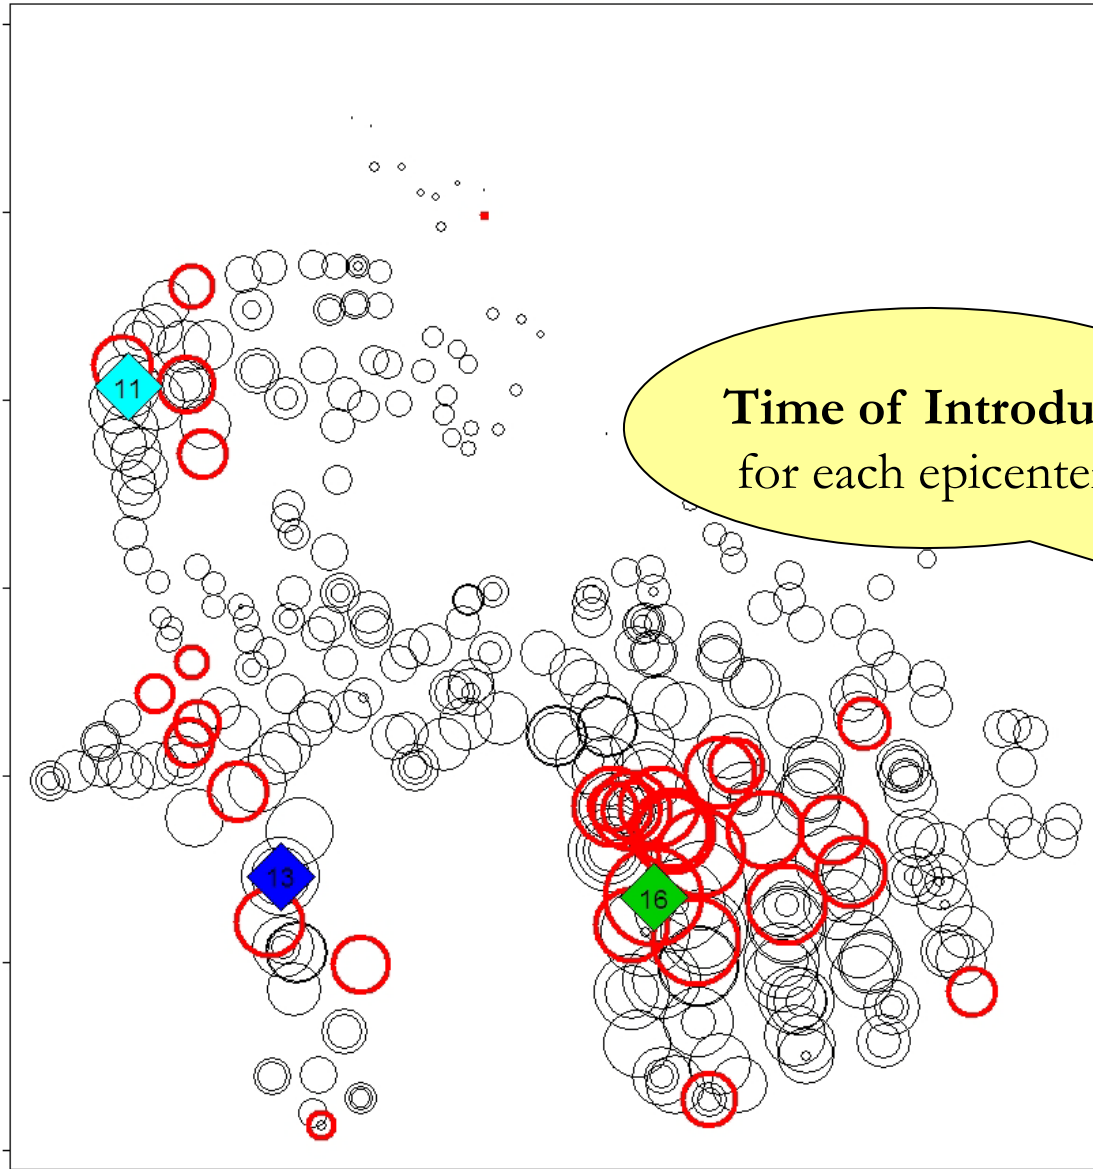

Time of Introduction  
for each epicenter

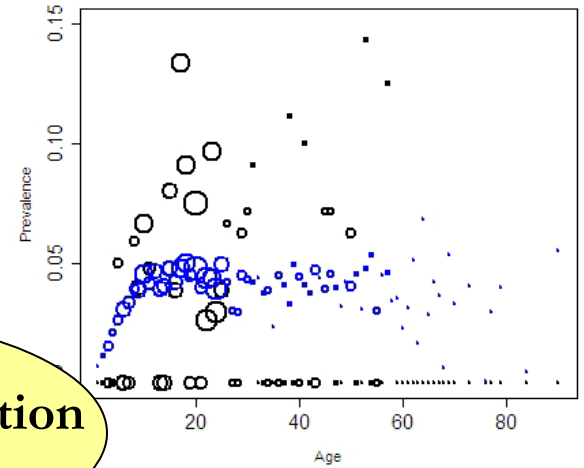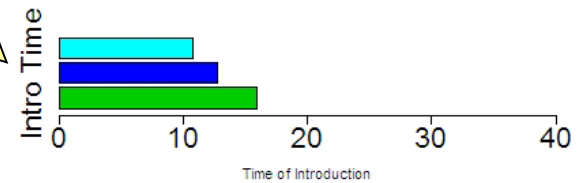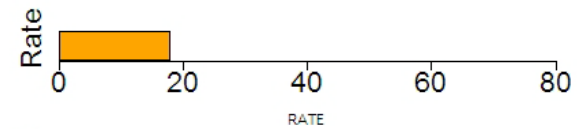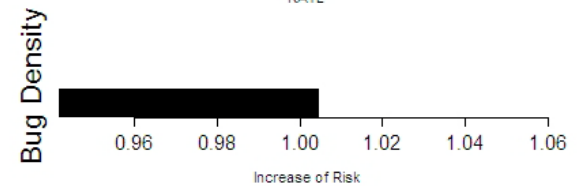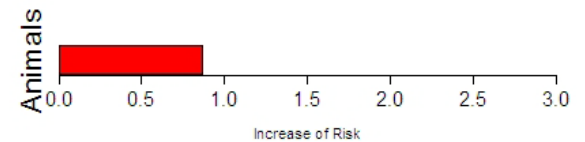

# Movie of fitting Guadalupe data with 3 epicenters

Chain 20050

Likelihood =  $9.78e-71$

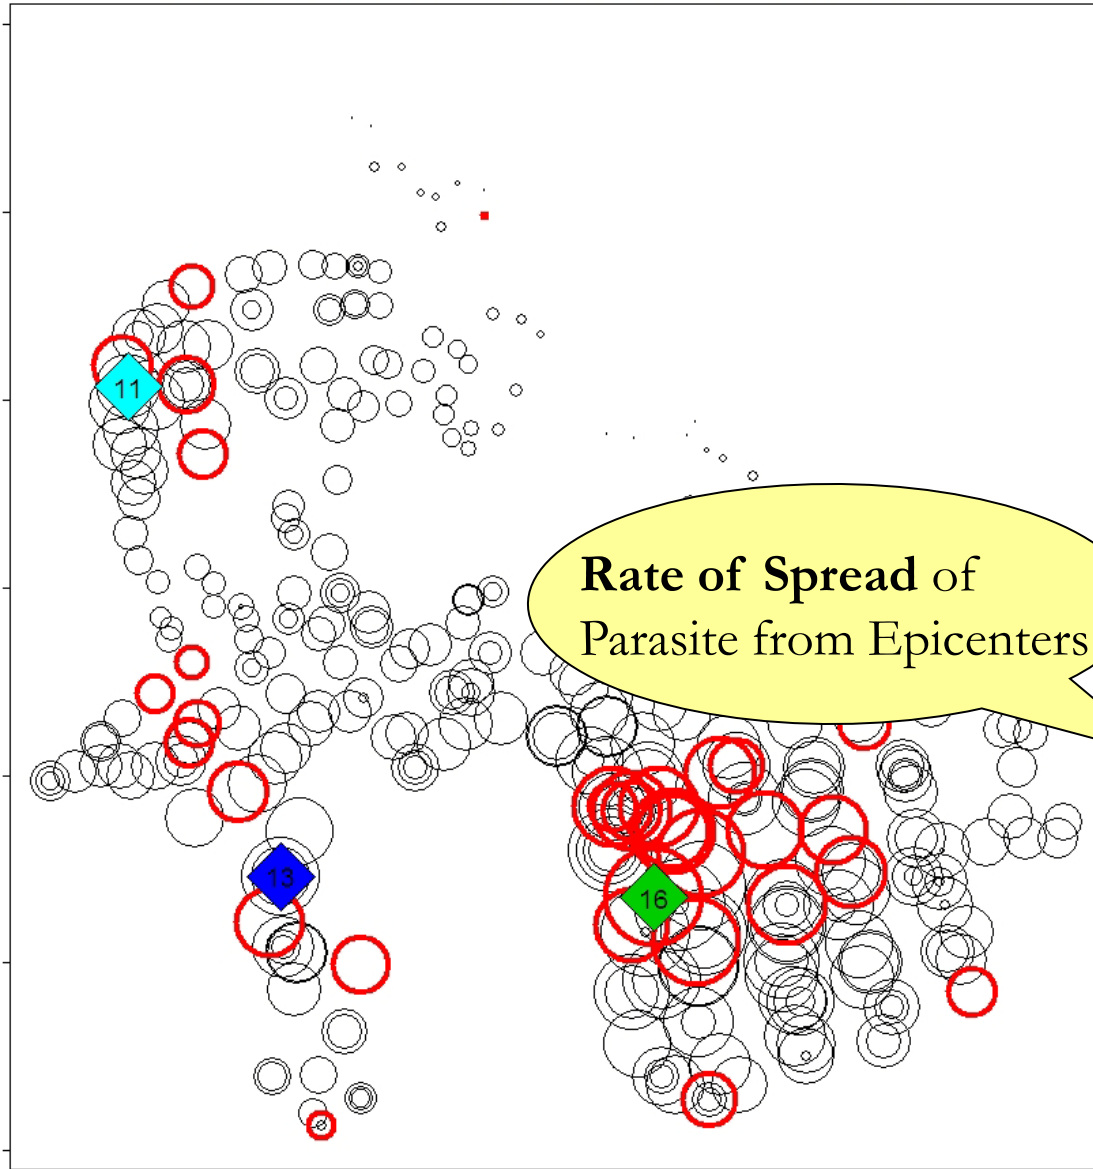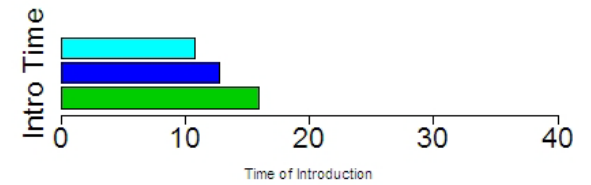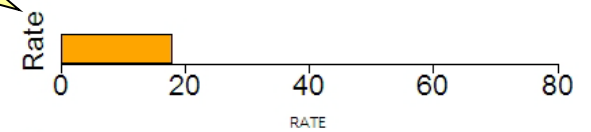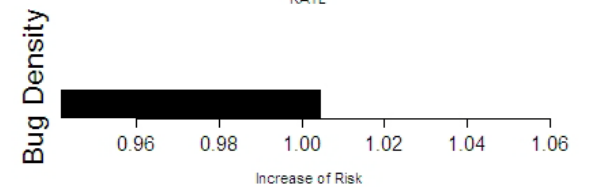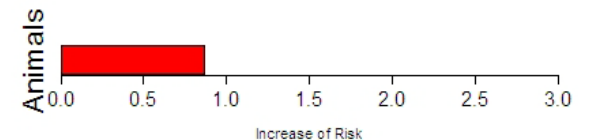

# Movie of fitting Guadalupe data with 3 epicenters

Chain 20050

Likelihood =  $9.78e-71$

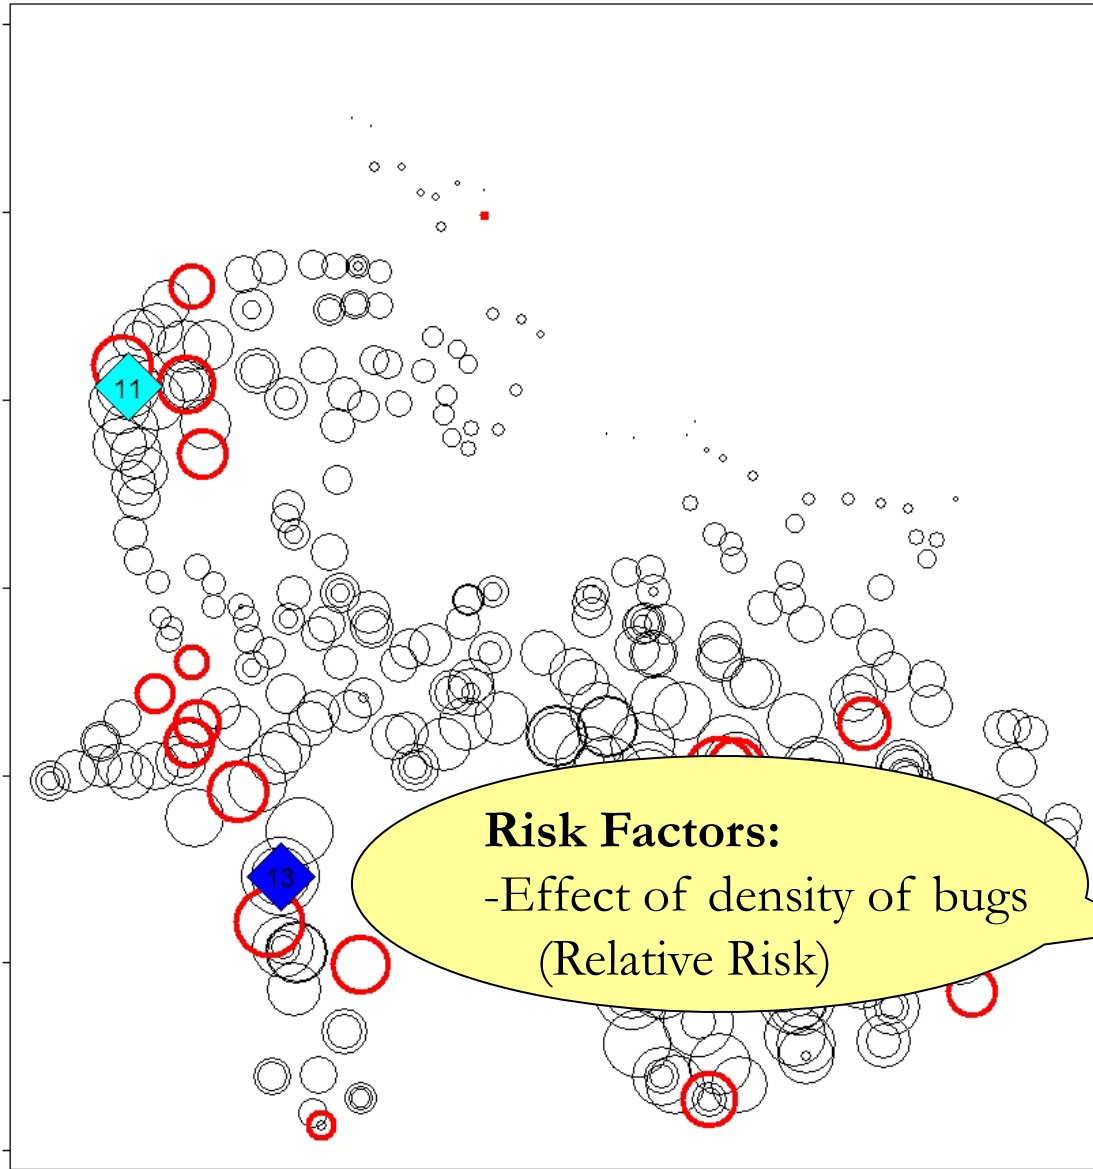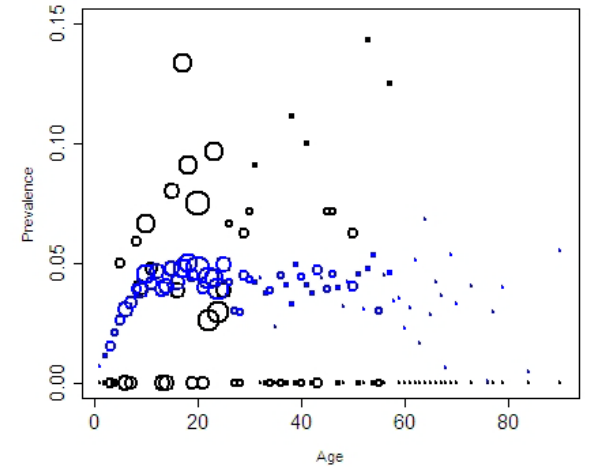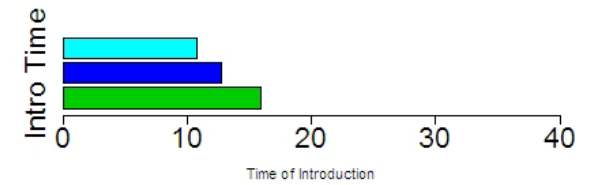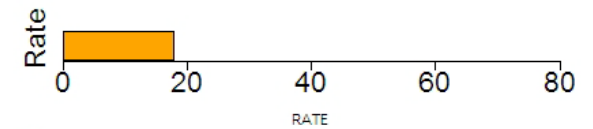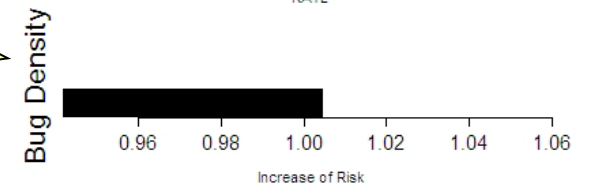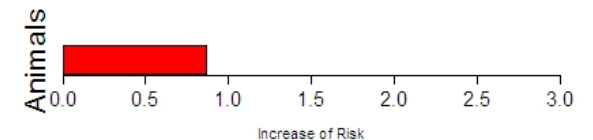

# Movie of fitting Guadalupe data with 3 epicenters

Chain 20050

Likelihood =  $9.78e-71$

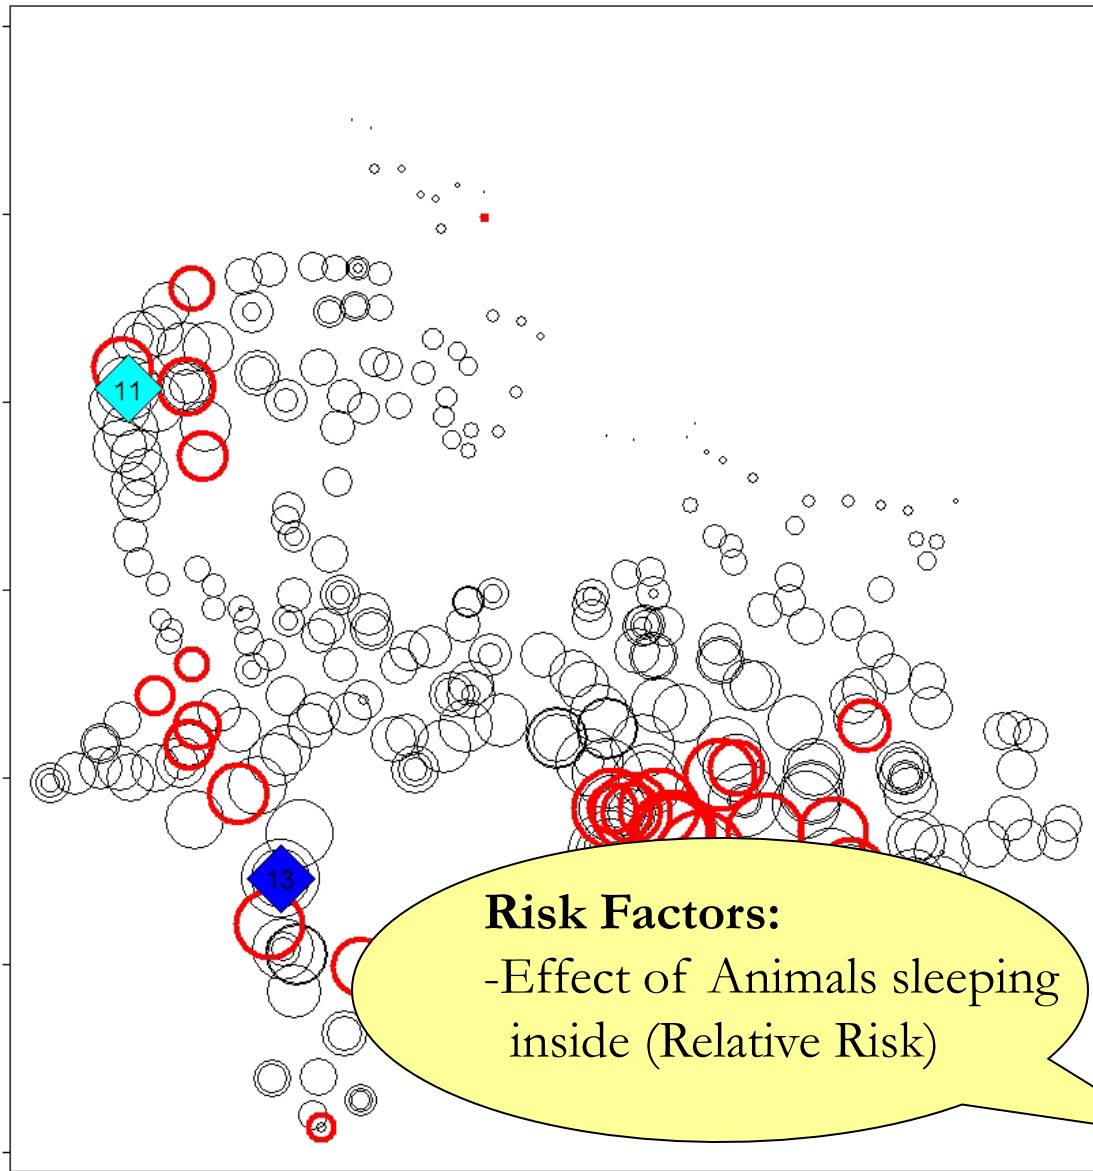

**Risk Factors:**  
-Effect of Animals sleeping inside (Relative Risk)

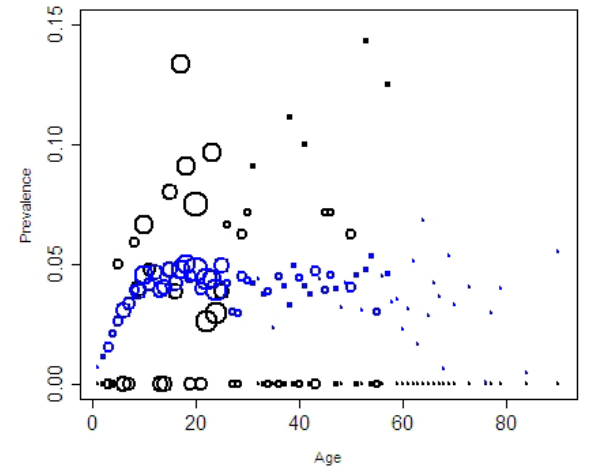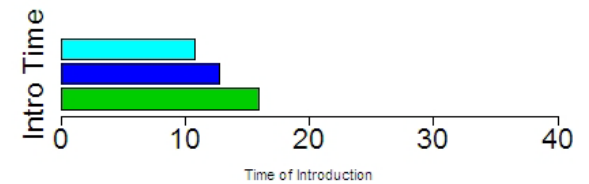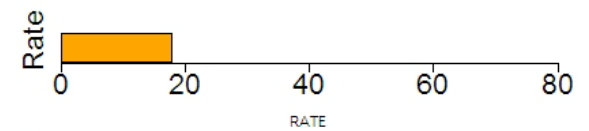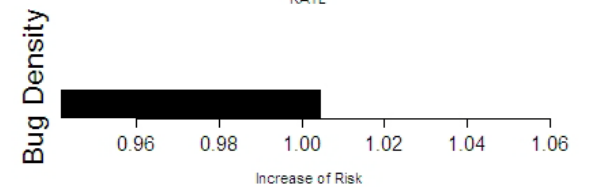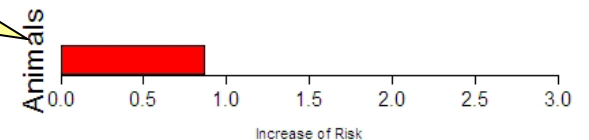

# Movie of fitting Guadalupe data with 3 epicenters

Chain 20050

Likelihood =  $9.78e-71$

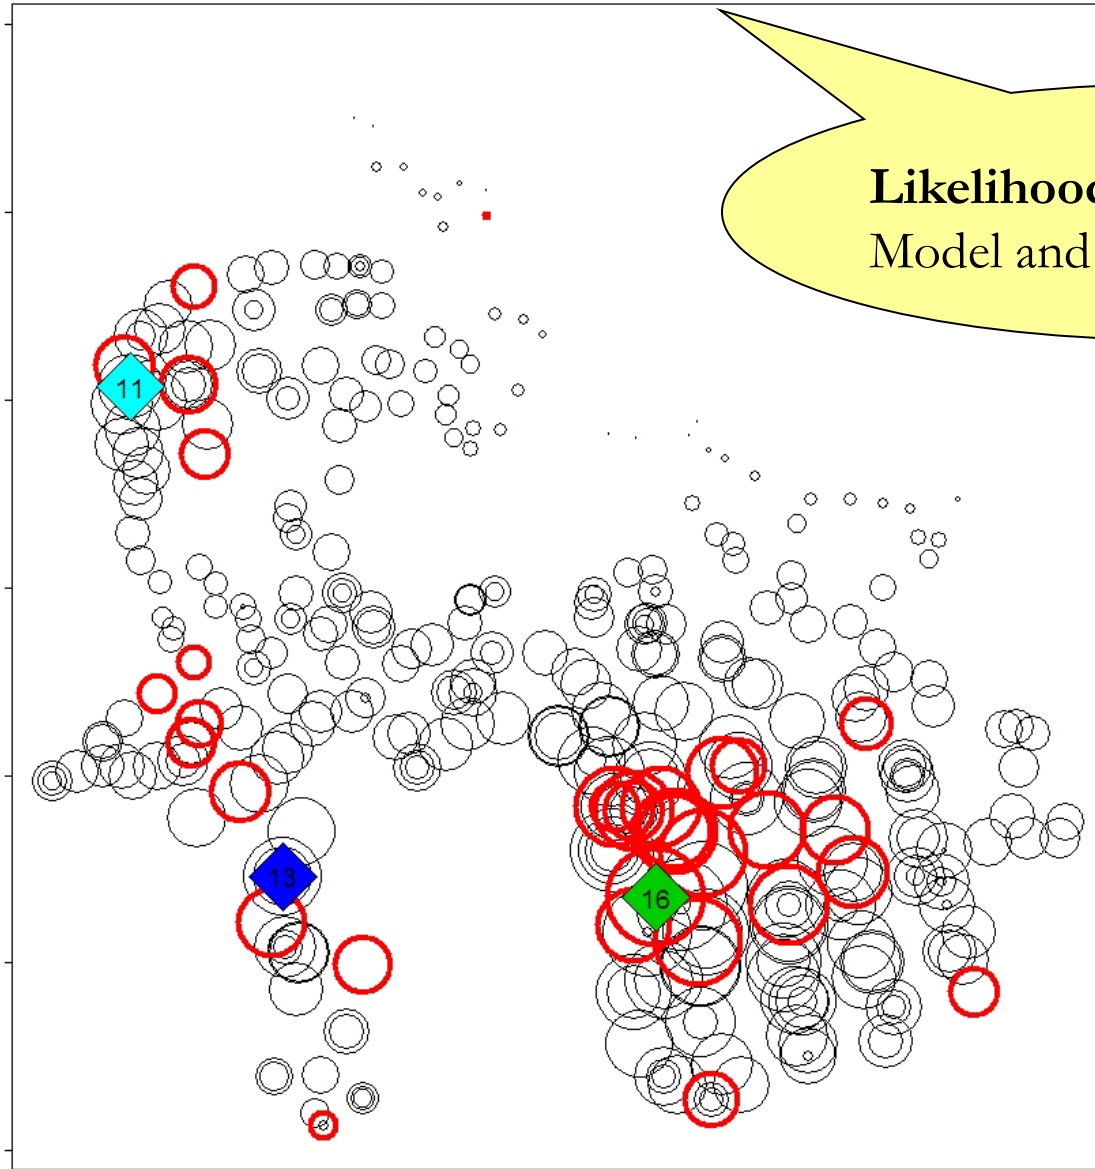

Likelihood of the data given the Model and parameter values.

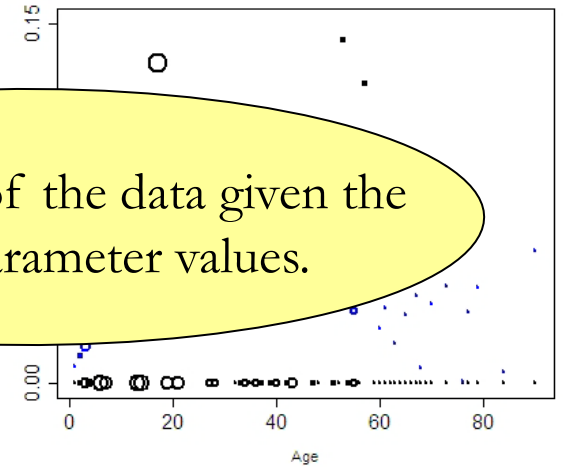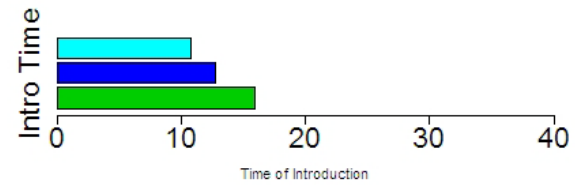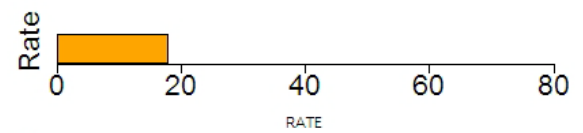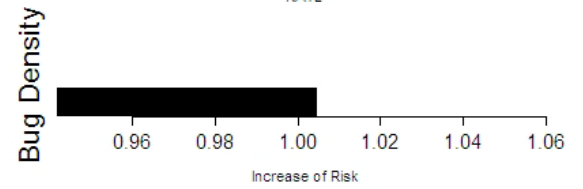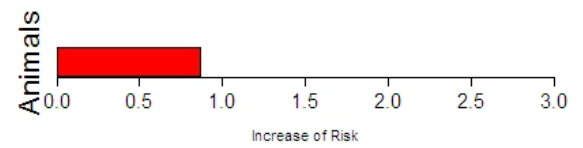

# Movie of fitting Guadalupe data with 3 epicenters

Chain 20050

Likelihood =  $9.78e-71$

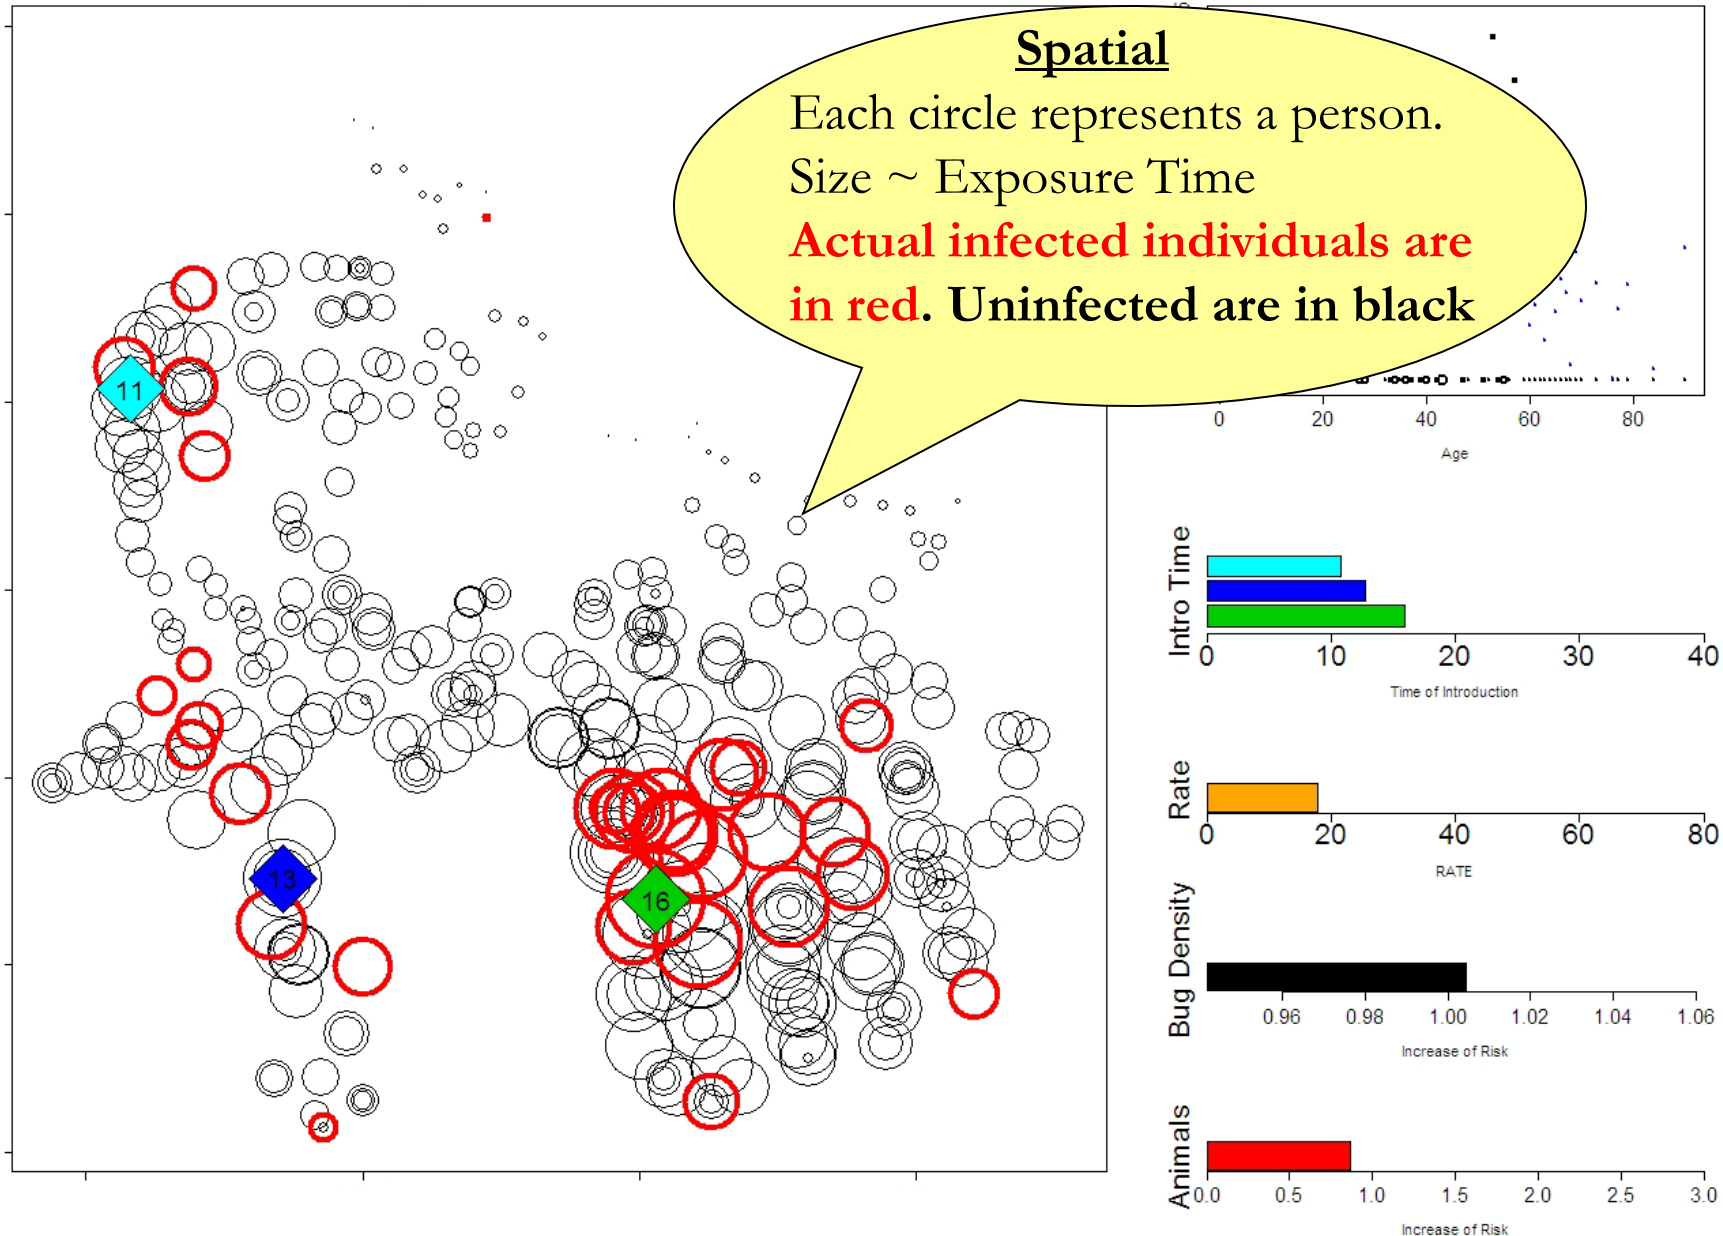



# Movie of fitting Guadalupe data with 3 epicenters

Chain 20050

Likelihood =  $9.78e-71$

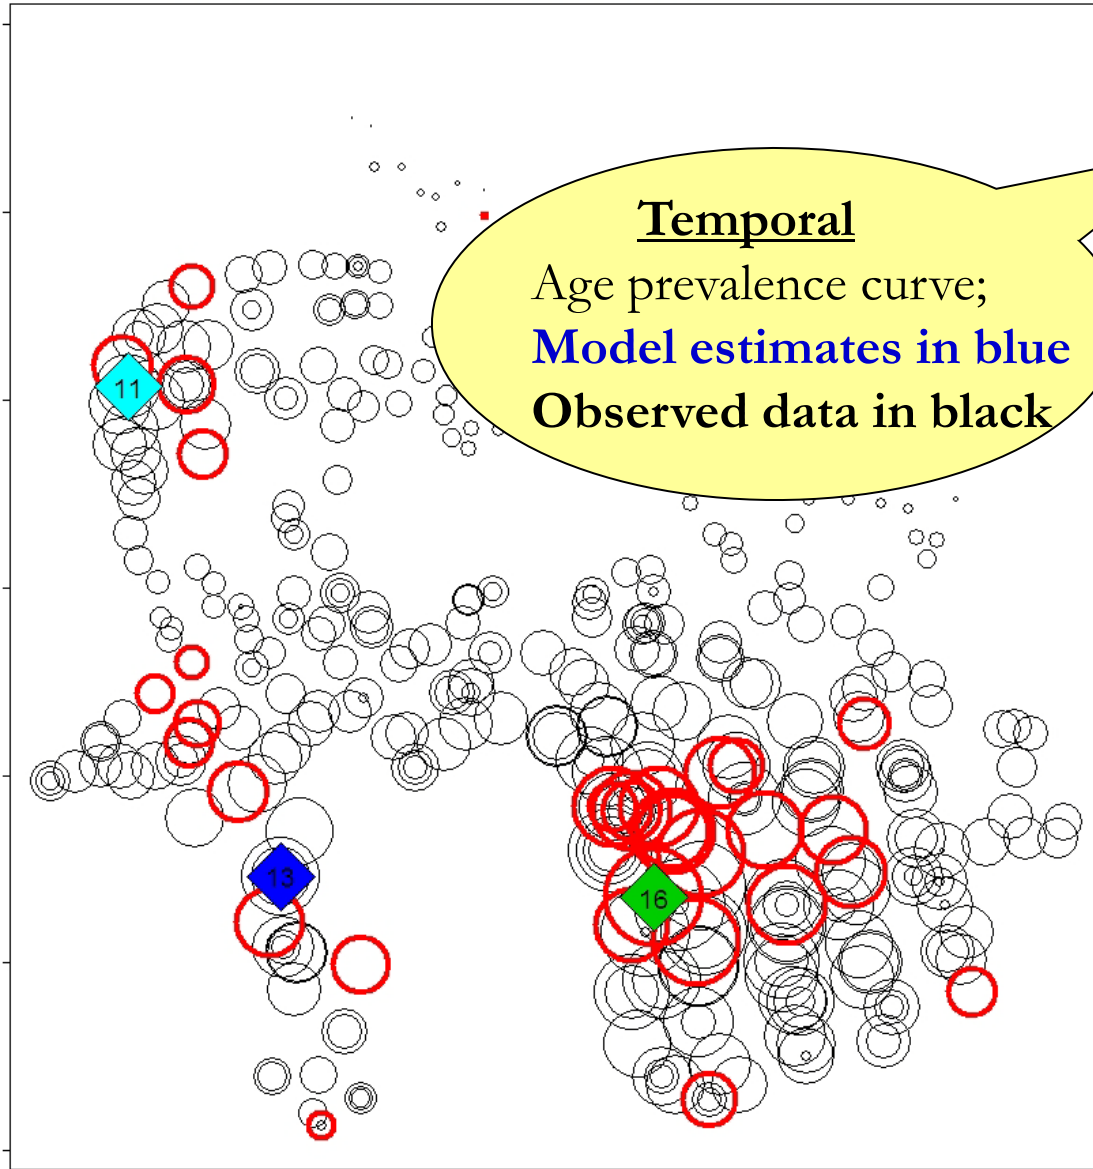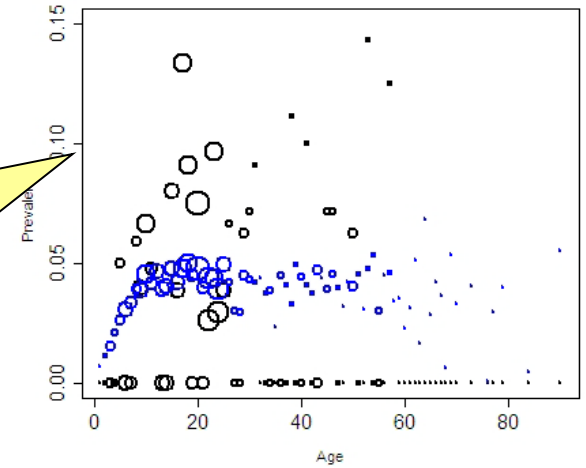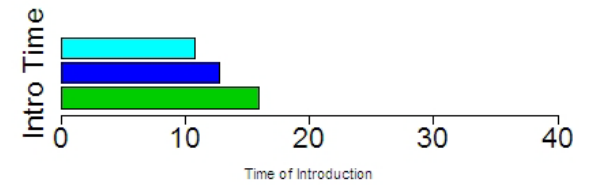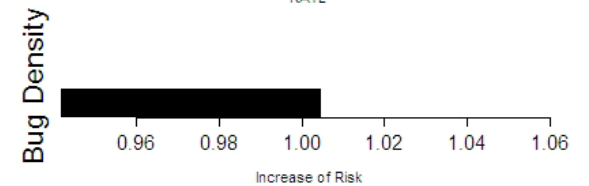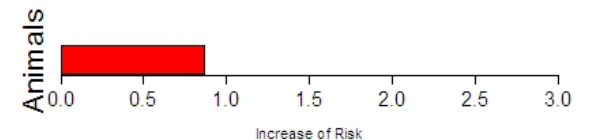

Supplement: pcbi.1002146.s004.pdf [file pcbi.1002146.s004.pdf]
